# Supplementary material for: Common Genetic Variation Near Melatonin Receptor MTNR1B Contributes to Raised Plasma Glucose and Increased Risk of Type 2 Diabetes Among Indian Asians and European Caucasians
Source: PubMed Central journal article supplement — Diabetes. 2009 Aug 13;58(11):2703–8. doi: 10.2337/db08-1805 (PMC2768158; doi:10.2337/db08-1805), 2009-08-13
Supplement: supp_db08-1805_db08-1805_online_appendix.pdf [file supp_db08-1805_db08-1805_online_appendix.pdf]

## **Supplementary Online Material**

**Common genetic variation near melatonin receptor *MTNR1B* contributes to raised plasma glucose and increased risk of type-2 diabetes amongst Indian Asians and European whites.**

John C Chambers, Weihua Zhang, Delilah Zabaneh, Joban Sehmi, Piyush Jain, Mark McCarthy, Philippe Froguel, Aimo Ruukonen, David Balding, Marjo-Riitta Jarvelin, James Scott, Paul Elliott, Jaspal S Kooner.

**Table S1.** Pairwise  $r^2$  between SNPs in the *MTNR1B* locus, amongst Indian Asians and the HapMap CEU sample (HapMap PhaseIII/Rel#1 Sept 2008, NCBI B36 assembly, dbSNP b126)

|                         | Indian Asians |           |           | HapMap CEU |           |           |
|-------------------------|---------------|-----------|-----------|------------|-----------|-----------|
|                         | rs2166706     | rs3847554 | rs1387153 | rs2166706  | rs3847554 | rs1387153 |
| rs3847554               | 0.80          |           |           | 0.79       |           |           |
| rs1387153               | 0.71          | 0.57      |           | 0.60       | 0.56      |           |
| rs10830963 <sup>†</sup> | -             | -         | -         | 0.45       | 0.45      | 0.65      |

<sup>†</sup>rs10830963 – previously reported to be associated with glucose levels in Europeans

**Table S2.** SNPs associated with glucose levels amongst Indian Asians at  $P < 5 \times 10^{-8}$ , in combined analysis of the Hap610 and Hap300 samples. G=genotyped, I=imputed.

| SNP        | Chr | Position  | Locus         | Hap610 | Hap300 | P=                  |
|------------|-----|-----------|---------------|--------|--------|---------------------|
| rs10830963 | 11  | 92348358  | <i>MTNR1B</i> | I      | I      | $8 \times 10^{-12}$ |
| rs10830962 | 11  | 92338075  | <i>MTNR1B</i> | I      | I      | $3 \times 10^{-10}$ |
| rs11523890 | 11  | 92319426  | <i>MTNR1B</i> | I      | I      | $6 \times 10^{-10}$ |
| rs10765573 | 11  | 92322980  | <i>MTNR1B</i> | I      | I      | $6 \times 10^{-10}$ |
| rs7936247  | 11  | 92329680  | <i>MTNR1B</i> | I      | I      | $7 \times 10^{-10}$ |
| rs10830961 | 11  | 92334405  | <i>MTNR1B</i> | I      | I      | $9 \times 10^{-10}$ |
| rs10830956 | 11  | 92320661  | <i>MTNR1B</i> | I      | I      | $2 \times 10^{-9}$  |
| rs2166706  | 11  | 92331180  | <i>MTNR1B</i> | G      | G      | $2 \times 10^{-9}$  |
| rs12792753 | 11  | 92308623  | <i>MTNR1B</i> | I      | I      | $2 \times 10^{-9}$  |
| rs7933855  | 11  | 92323970  | <i>MTNR1B</i> | I      | I      | $2 \times 10^{-9}$  |
| rs11020124 | 11  | 92330309  | <i>MTNR1B</i> | I      | I      | $3 \times 10^{-9}$  |
| rs3781638  | 11  | 92353155  | <i>MTNR1B</i> | I      | I      | $3 \times 10^{-9}$  |
| rs1387153  | 11  | 92313476  | <i>MTNR1B</i> | G      | G      | $4 \times 10^{-9}$  |
| rs4753072  | 11  | 92357053  | <i>MTNR1B</i> | I      | I      | $6 \times 10^{-9}$  |
| rs1447350  | 11  | 92357775  | <i>MTNR1B</i> | I      | I      | $6 \times 10^{-9}$  |
| rs4753426  | 11  | 92341244  | <i>MTNR1B</i> | I      | I      | $7 \times 10^{-9}$  |
| rs4753073  | 11  | 92357123  | <i>MTNR1B</i> | I      | I      | $8 \times 10^{-9}$  |
| rs7951037  | 11  | 92345823  | <i>MTNR1B</i> | I      | I      | $9 \times 10^{-9}$  |
| rs7112766  | 11  | 92311669  | <i>MTNR1B</i> | I      | -      | $9 \times 10^{-9}$  |
| rs11020107 | 11  | 92307378  | <i>MTNR1B</i> | I      | I      | $1 \times 10^{-8}$  |
| rs3847554  | 11  | 92308474  | <i>MTNR1B</i> | G      | G      | $1 \times 10^{-8}$  |
| rs1402837  | 2   | 169465600 | <i>G6PC2</i>  | G      | I      | $2 \times 10^{-8}$  |
| rs730497   | 7   | 44190246  | <i>GCK</i>    | G      | I      | $2 \times 10^{-8}$  |
| rs2908289  | 7   | 44190467  | <i>GCK</i>    | G      | I      | $2 \times 10^{-8}$  |
| rs1799884  | 7   | 44195593  | <i>GCK</i>    | G      | I      | $3 \times 10^{-8}$  |
| rs6975024  | 7   | 44198411  | <i>GCK</i>    | I      | I      | $4 \times 10^{-8}$  |
| rs2908282  | 7   | 44215353  | <i>GCK</i>    | I      | I      | $4 \times 10^{-8}$  |
| rs4607517  | 7   | 44202193  | <i>GCK</i>    | G      | G      | $5 \times 10^{-8}$  |
| rs917793   | 7   | 44212378  | <i>GCK</i>    | I      | I      | $5 \times 10^{-8}$  |

**Table S3.** Risk allele frequencies and association test results amongst Indian Asians and European whites, for SNPs at the *GCKR*, *GCK* and *G6PC2* reported to be associated with glucose levels (1-3). Effect sizes are shown as change in fasting glucose (95% confidence interval) per copy of risk allele.

| SNP                    | Gene         | Risk Allele | Risk allele frequency (%) |                 |                        | Effect (mmol/L)           |                      |                            | Interaction P=       |      |
|------------------------|--------------|-------------|---------------------------|-----------------|------------------------|---------------------------|----------------------|----------------------------|----------------------|------|
|                        |              |             | Indian Asians             | European whites | P=                     | Indian Asians             | P=                   | European whites            |                      | P=   |
| rs1260326              | <i>GCKR</i>  | G           | 73                        | 65              | $7.9 \times 10^{-32}$  | 0.039<br>(0.011 to 0.066) | 0.006                | 0.016<br>(-0.003 to 0.034) | 0.10                 | 0.09 |
| rs560887               | <i>G6PC2</i> | G           | 85                        | 69              | $1.4 \times 10^{-146}$ | 0.068<br>(0.034 to 0.102) | $9.0 \times 10^{-5}$ | 0.059<br>(0.040 to 0.078)  | $2.0 \times 10^{-9}$ | 0.53 |
| rs4607517 <sup>†</sup> | <i>GCK</i>   | A           | 12                        | 12              | 0.56                   | 0.068<br>(0.031 to 0.106) | $3.8 \times 10^{-4}$ | 0.043<br>(0.016 to 0.070)  | 0.002                | 0.57 |

<sup>†</sup> rs4607517 is a perfect proxy ( $r^2=1.0$ ) for rs730497

**Figure S1.** QQ plot of the association test results with glucose levels in the Hap610 sample (Figure S1a), the Hap300 sample (Figure S1b), and in meta-analysis (Figure S1c). The red line shows the expected distribution under the null hypothesis of no association at any locus, and the green line the 95% confidence limits of the null hypothesis distribution.

*Figure S1a*

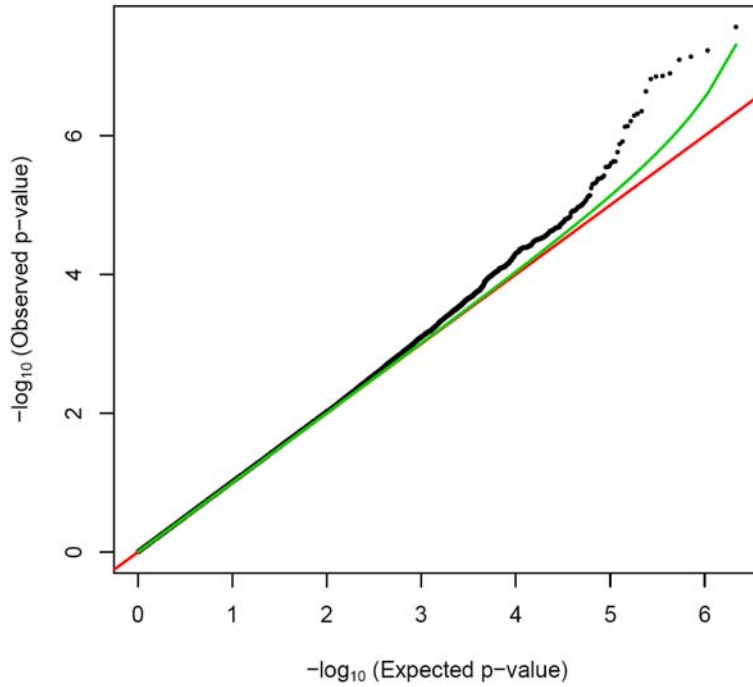

*Figure S1b*

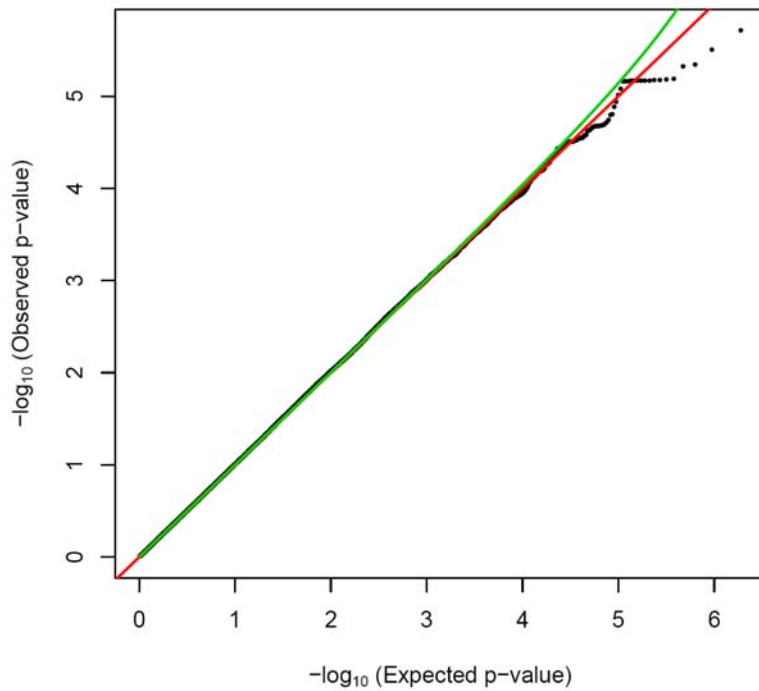

Figure S1c

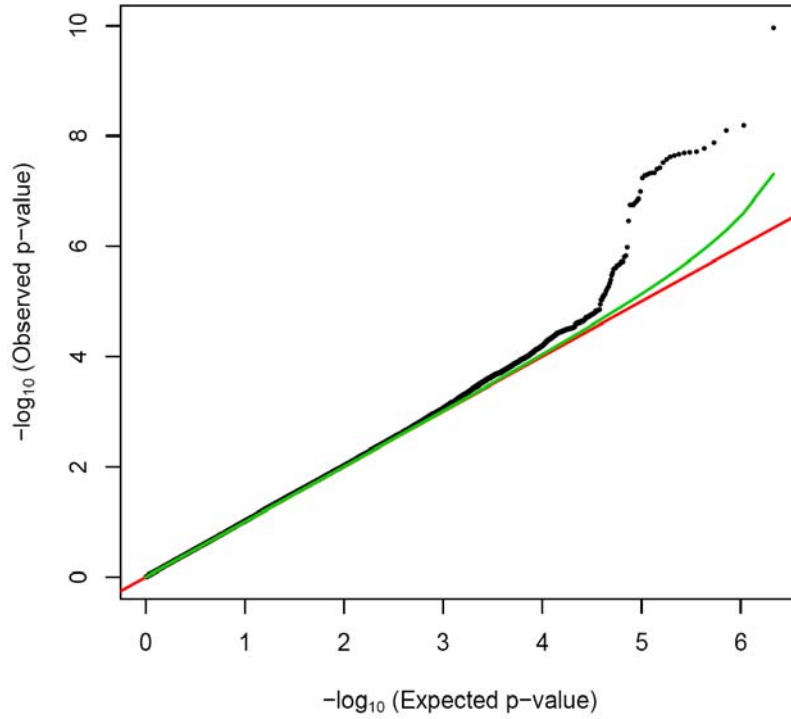

**Figure S2.** Signal-Intensity (Manhattan) plot showing the association of SNPs with glucose levels in the Hap610 sample (Figure S2a), the Hap300 sample (Figure S2b), and in meta-analysis (Figure S2c).

Figure S2a

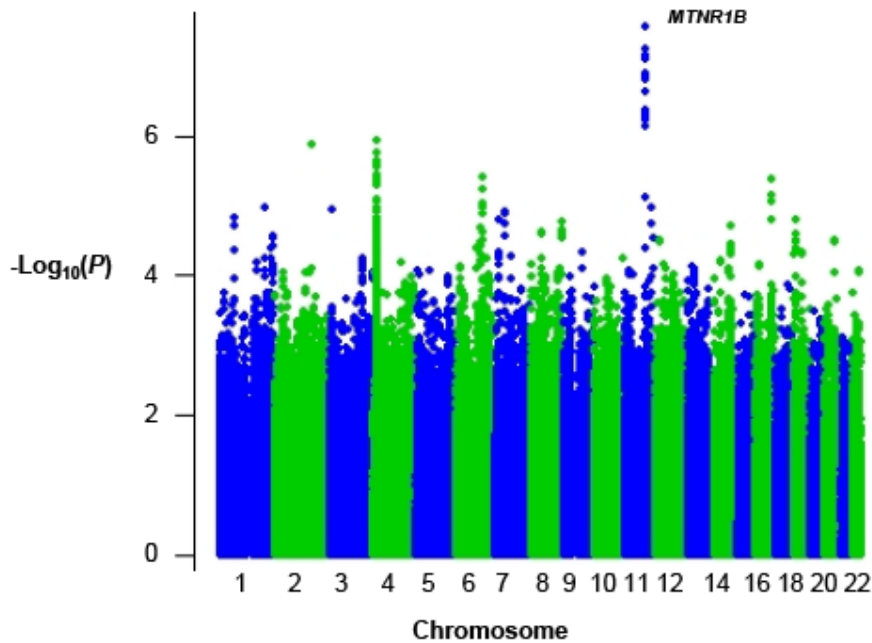

Figure S2b

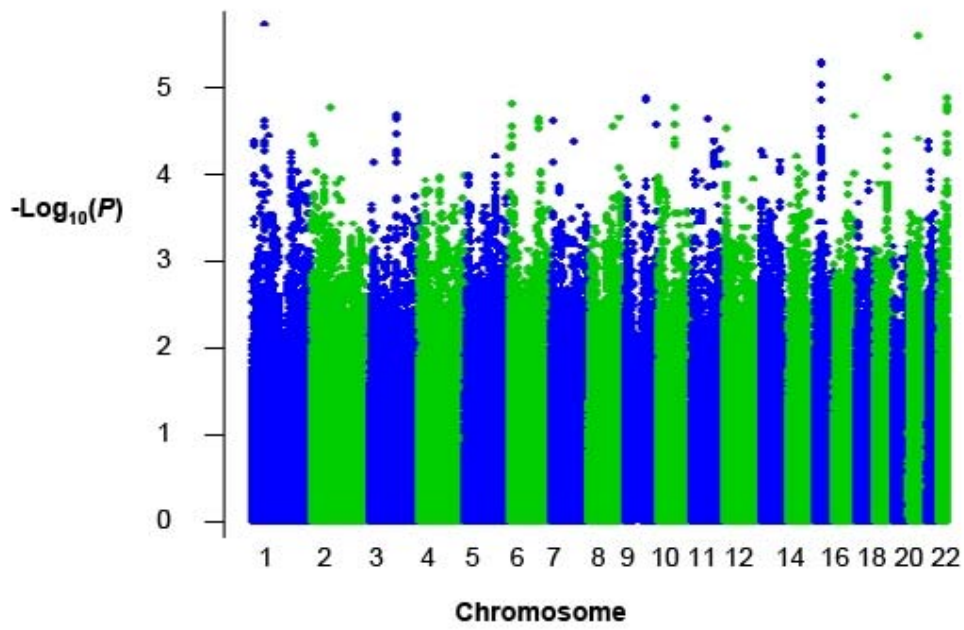

Figure S2c

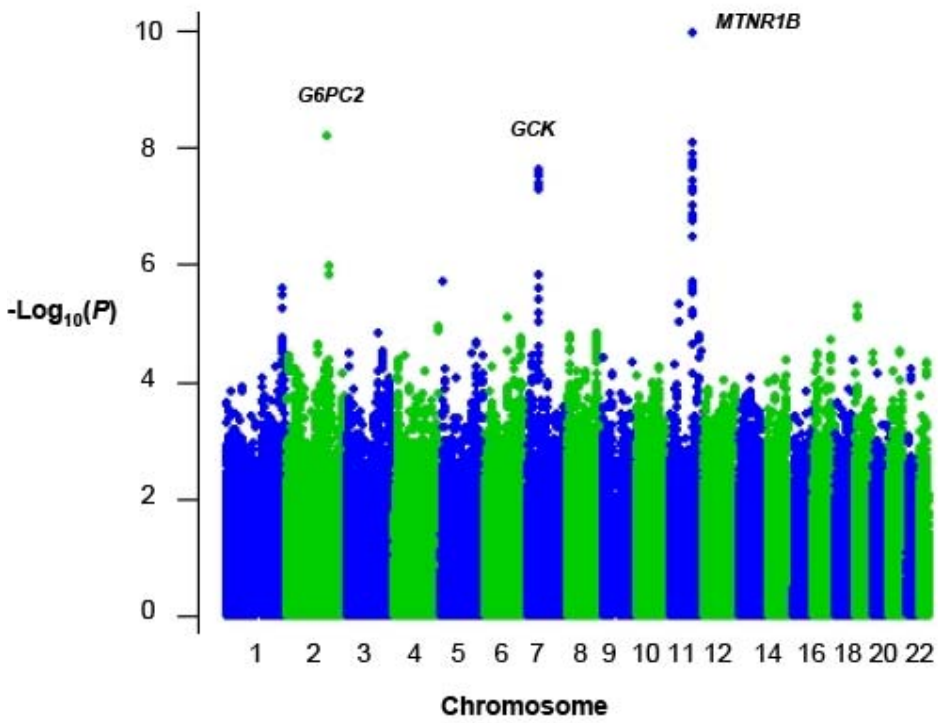

**Figure S3.** Genomic context of *GCK* region (chromosome 7) showing pairwise linkage disequilibrium between SNPs with MAF  $\geq 0.05$  directly genotyped amongst Indian Asians (Figure S3a) and European whites (Figure S3b), using Haploview's standard color scheme.

Figure S3a: Indian Asians.

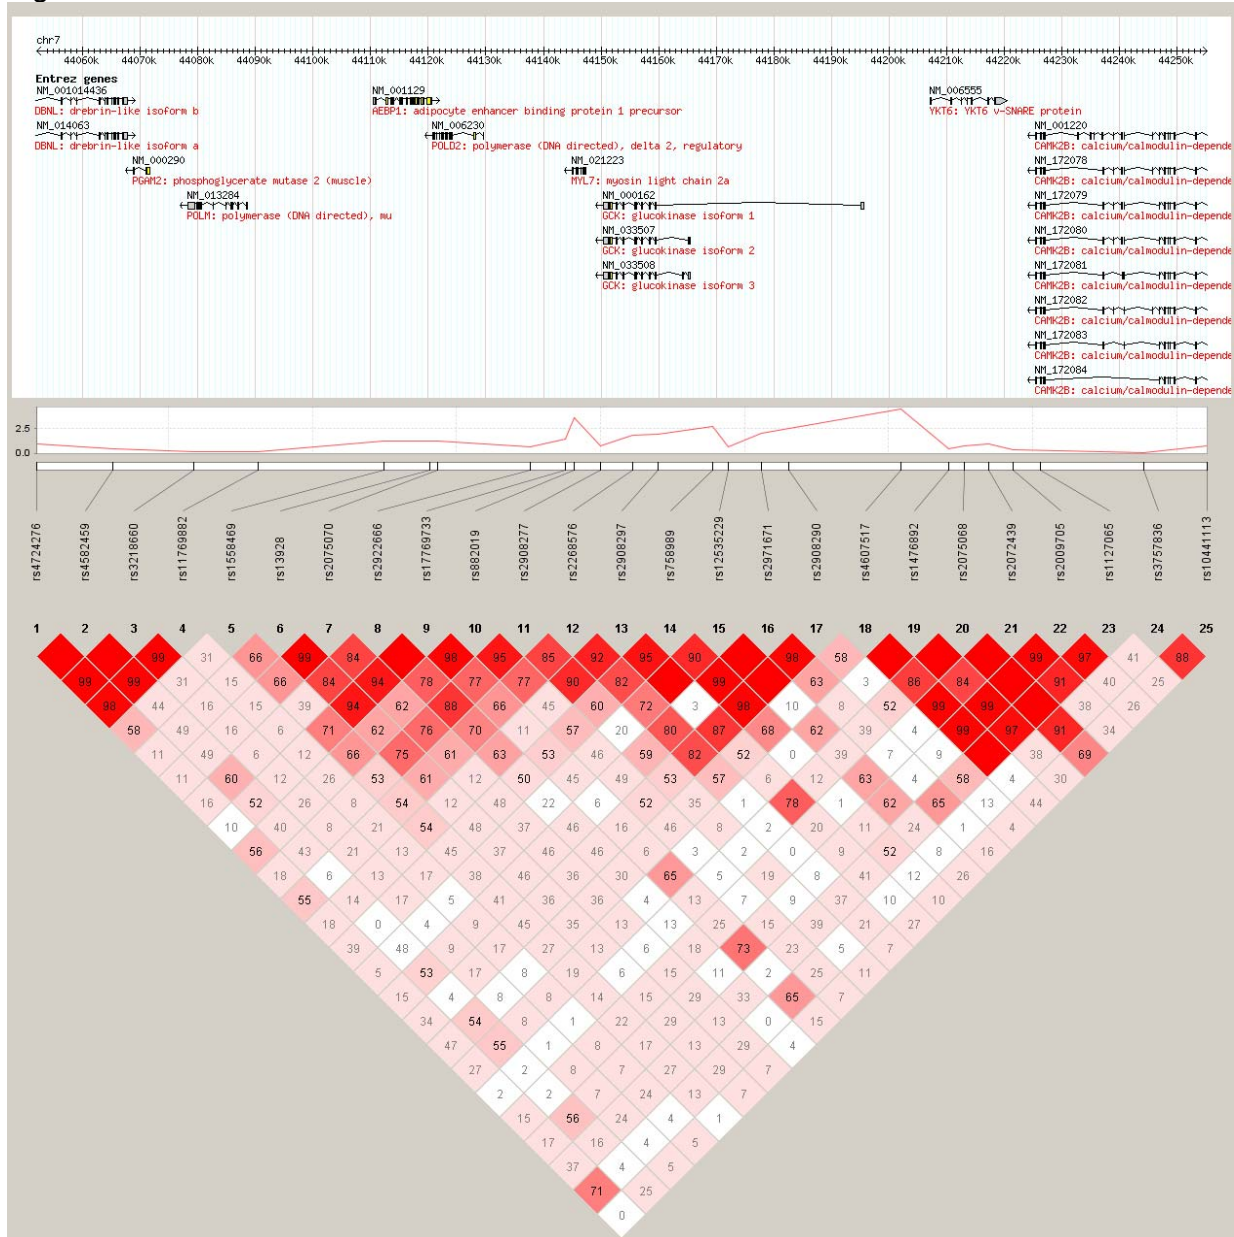

Figure S3b: European whites.

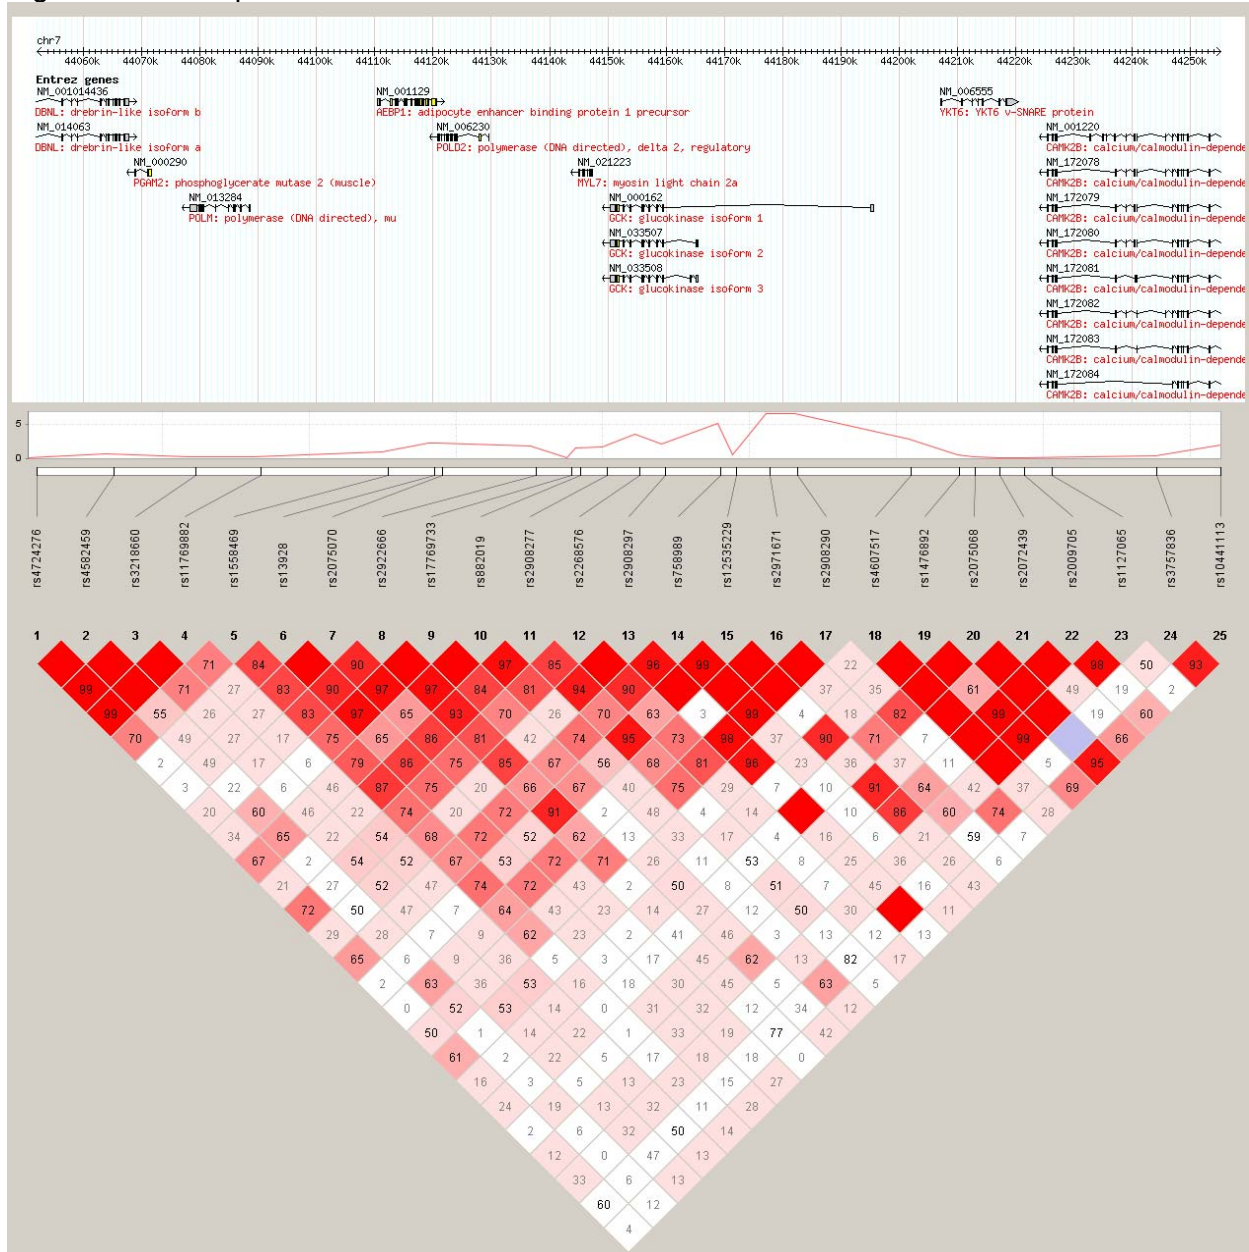



**Figure S4.** Genomic context of *G6PC2* (chromosome 2) showing pairwise linkage disequilibrium between SNPs with MAF  $\geq 0.05$  directly genotyped amongst Indian Asians (Figure S4a) and the European whites (Figure S4b), using Haploview's standard color scheme.

Figure S4a: Indian Asians.

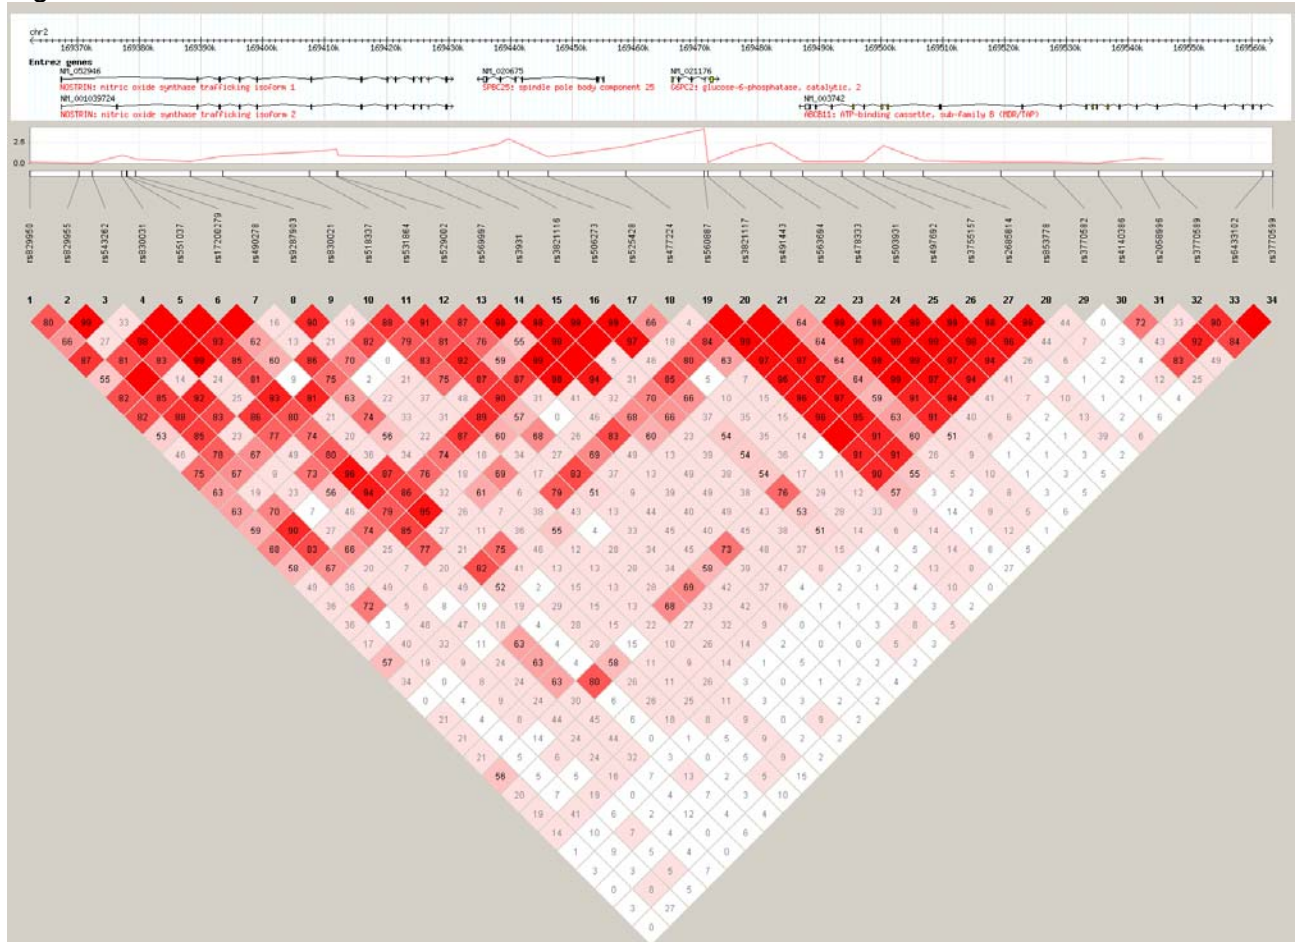

Figure S4b: European whites.

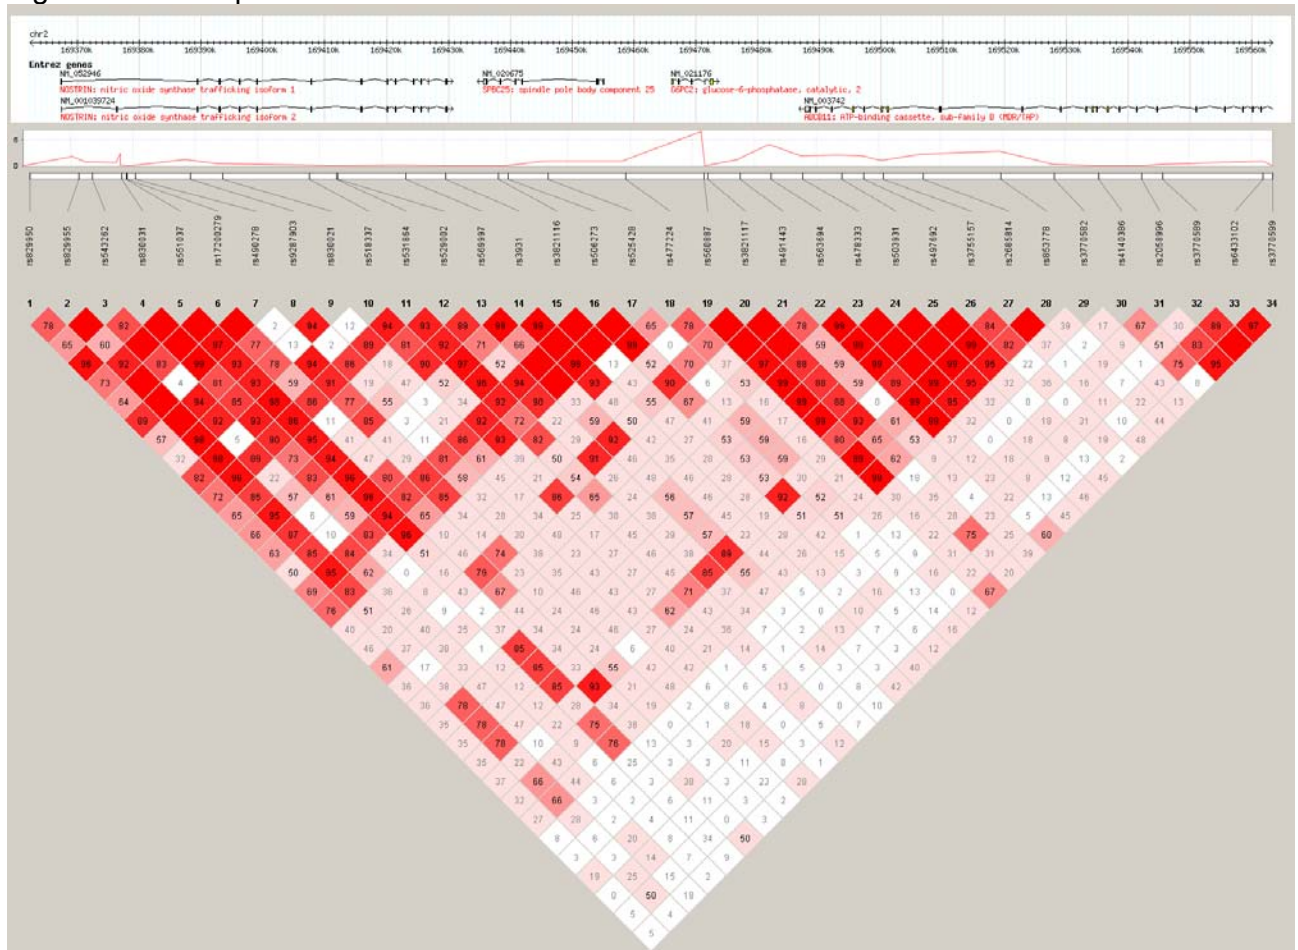

### Supplementary references

1. Bouatia-Naji,N, Rocheleau,G, Van,LL, Lemaire,K, Schuit,F, Cavalcanti-Proenca,C, Marchand,M, Hartikainen,AL, Sovio,U, De,GF, Rung,J, Vaxillaire,M, Tichet,J, Marre,M, Balkau,B, Weill,J, Elliott,P, Jarvelin,MR, Meyre,D, Polychronakos,C, Dina,C, Sladek,R, Froguel,P: A polymorphism within the G6PC2 gene is associated with fasting plasma glucose levels. *Science* 320:1085-1088, 2008
2. Vaxillaire,M, Cavalcanti-Proenca,C, Dechaume,A, Tichet,J, Marre,M, Balkau,B, Froguel,P: The common P446L polymorphism in GCKR inversely modulates fasting glucose and triglyceride levels and reduces type 2 diabetes risk in the DESIR prospective general French population. *Diabetes* 57:2253-2257, 2008
3. Sabatti,C, Service,SK, Hartikainen,AL, Pouta,A, Ripatti,S, Brodsky,J, Jones,CG, Zaitlen,NA, Varilo,T, Kaakinen,M, Sovio,U, Ruukonen,A, Laitinen,J, Jakkula,E, Coin,L, Hoggart,C, Collins,A, Turunen,H, Gabriel,S, Elliot,P, McCarthy,MI, Daly,MJ, Jarvelin,MR, Freimer,NB, Peltonen,L: Genome-wide association analysis of metabolic traits in a birth cohort from a founder population. *Nat Genet* 41:35-46, 2009
